# Supplementary material for: Outcomes of Percutaneous Coronary Intervention for In‐Stent Restenosis Versus De Novo Lesions: A Meta‐Analysis
Source: PubMed Central journal article supplement — J Am Heart Assoc. 2023 Jun 29;12(13):e029300. doi: 10.1161/JAHA.122.029300 (PMC10356080; doi:10.1161/jaha.122.029300), 2023-06-29

# **SUPPLEMENTAL MATERIAL**

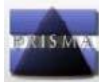

**Table S1.**

**PRISMA 2020 Checklist**

| Section and Topic             | Item # | Checklist item                                                                                                                                                                                                                                                                                       | Location where item is reported                           |
|-------------------------------|--------|------------------------------------------------------------------------------------------------------------------------------------------------------------------------------------------------------------------------------------------------------------------------------------------------------|-----------------------------------------------------------|
| <b>TITLE</b>                  |        |                                                                                                                                                                                                                                                                                                      |                                                           |
| Title                         | 1      | Identify the report as a systematic review.                                                                                                                                                                                                                                                          | Title, Pg 1                                               |
| <b>ABSTRACT</b>               |        |                                                                                                                                                                                                                                                                                                      |                                                           |
| Abstract                      | 2      | See the PRISMA 2020 for Abstracts checklist.                                                                                                                                                                                                                                                         | Abstract, Pg 2                                            |
| <b>INTRODUCTION</b>           |        |                                                                                                                                                                                                                                                                                                      |                                                           |
| Rationale                     | 3      | Describe the rationale for the review in the context of existing knowledge.                                                                                                                                                                                                                          | Lines 6-14, Pg 3                                          |
| Objectives                    | 4      | Provide an explicit statement of the objective(s) or question(s) the review addresses.                                                                                                                                                                                                               | Lines 14-16, Pg 3                                         |
| <b>METHODS</b>                |        |                                                                                                                                                                                                                                                                                                      |                                                           |
| Eligibility criteria          | 5      | Specify the inclusion and exclusion criteria for the review and how studies were grouped for the syntheses.                                                                                                                                                                                          | "Selection Criteria", Pg 4                                |
| Information sources           | 6      | Specify all databases, registers, websites, organisations, reference lists and other sources searched or consulted to identify studies. Specify the date when each source was last searched or consulted.                                                                                            | "Methods" Lines 18-23, Pg 3 and Lines 1-10, Pg 4          |
| Search strategy               | 7      | Present the full search strategies for all databases, registers and websites, including any filters and limits used.                                                                                                                                                                                 | "Methods" Lines 18-23, Pg 3 and Lines 1-10, Pg 4          |
| Selection process             | 8      | Specify the methods used to decide whether a study met the inclusion criteria of the review, including how many reviewers screened each record and each report retrieved, whether they worked independently, and if applicable, details of automation tools used in the process.                     | Lines 12-21, Pg 4                                         |
| Data collection process       | 9      | Specify the methods used to collect data from reports, including how many reviewers collected data from each report, whether they worked independently, any processes for obtaining or confirming data from study investigators, and if applicable, details of automation tools used in the process. | "Data Extraction", Pg 4                                   |
| Data items                    | 10a    | List and define all outcomes for which data were sought. Specify whether all results that were compatible with each outcome domain in each study were sought (e.g. for all measures, time points, analyses), and if not, the methods used to decide which results to collect.                        | "Outcomes", Line 23, Pg 4 and Lines 1-4, Pg 5             |
|                               | 10b    | List and define all other variables for which data were sought (e.g. participant and intervention characteristics, funding sources). Describe any assumptions made about any missing or unclear information.                                                                                         | "Outcomes", Line 23, Pg 4 and Lines 1-4, Pg 5             |
| Study risk of bias assessment | 11     | Specify the methods used to assess risk of bias in the included studies, including details of the tool(s) used, how many reviewers assessed each study and whether they worked independently, and if applicable, details of automation tools used in the process.                                    | "Assessment of the quality of the included studies", Pg 5 |
| Effect measures               | 12     | Specify for each outcome the effect measure(s) (e.g. risk ratio, mean difference) used in the synthesis or presentation of results.                                                                                                                                                                  | "Statistical Analysis", Pg 5                              |
| Synthesis methods             | 13a    | Describe the processes used to decide which studies were eligible for each synthesis (e.g. tabulating the study intervention characteristics and comparing against the planned groups for each synthesis (item #5)).                                                                                 | "Assessment of the quality of the included studies", Pg 5 |
|                               | 13b    | Describe any methods required to prepare the data for presentation or synthesis, such as handling of missing summary statistics, or data conversions.                                                                                                                                                | Not Applicable                                            |
|                               | 13c    | Describe any methods used to tabulate or visually display results of individual studies and syntheses.                                                                                                                                                                                               | Tables 1,2,3 and Supplemental Tables 2,3,4                |
|                               | 13d    | Describe any methods used to synthesize results and provide a rationale for the choice(s). If meta-analysis was performed, describe the model(s), method(s) to identify the presence and extent of statistical heterogeneity, and software package(s) used.                                          | "Statistical Analysis", Pg 5                              |
|                               | 13e    | Describe any methods used to explore possible causes of heterogeneity among study results (e.g. subgroup analysis, meta-regression).                                                                                                                                                                 | Lines 12-18 of "Statistical Analysis", Pg 5               |
|                               | 13f    | Describe any sensitivity analyses conducted to assess robustness of the synthesized results.                                                                                                                                                                                                         | Lines 19-23 of "Statistical Analysis", Pg 5               |
| Reporting bias assessment     | 14     | Describe any methods used to assess risk of bias due to missing results in a synthesis (arising from reporting biases).                                                                                                                                                                              | "Assessment of the quality of the included studies", Pg 5 |

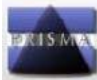

# PRISMA 2020 Checklist

| Certainty                                      | 15     | Describe any methods used to assess certainty (or confidence) in the body of evidence for an outcome.                                                                                                                                                                                | "Assessment of the quality of the included studies", Pg 5 |
|------------------------------------------------|--------|--------------------------------------------------------------------------------------------------------------------------------------------------------------------------------------------------------------------------------------------------------------------------------------|-----------------------------------------------------------|
| Section and Topic                              | Item # | Checklist item                                                                                                                                                                                                                                                                       | Location where item is reported                           |
| <b>RESULTS</b>                                 |        |                                                                                                                                                                                                                                                                                      |                                                           |
| Study selection                                | 16a    | Describe the results of the search and selection process, from the number of records identified in the search to the number of studies included in the review, ideally using a flow diagram.                                                                                         | Lines 4-6, Pg 6 and Figure 1                              |
|                                                | 16b    | Cite studies that might appear to meet the inclusion criteria, but which were excluded, and explain why they were excluded.                                                                                                                                                          | Not Applicable                                            |
| Study characteristics                          | 17     | Cite each included study and present its characteristics.                                                                                                                                                                                                                            | Line 4-16, Pg 6                                           |
| Risk of bias in studies                        | 18     | Present assessments of risk of bias for each included study.                                                                                                                                                                                                                         | Lines 17-19, Pg 6                                         |
| Results of individual studies                  | 19     | For all outcomes, present, for each study: (a) summary statistics for each group (where appropriate) and (b) an effect estimate and its precision (e.g. confidence/credible interval), ideally using structured tables or plots.                                                     | "Outcomes", Lines 20-22, Pg 6 and Lines 1-19, Pg 7        |
| Results of syntheses                           | 20a    | For each synthesis, briefly summarise the characteristics and risk of bias among contributing studies.                                                                                                                                                                               | Lines 17-19, Pg 6 and Supplemental Table 2                |
|                                                | 20b    | Present results of all statistical syntheses conducted. If meta-analysis was done, present for each the summary estimate and its precision (e.g. confidence/credible interval) and measures of statistical heterogeneity. If comparing groups, describe the direction of the effect. | "Outcomes", Lines 20-22, Pg 6 and Lines 1-19, Pg 7        |
|                                                | 20c    | Present results of all investigations of possible causes of heterogeneity among study results.                                                                                                                                                                                       | "Outcomes", Pg 6-7 and Lines 3-5, Pg 12                   |
|                                                | 20d    | Present results of all sensitivity analyses conducted to assess the robustness of the synthesized results.                                                                                                                                                                           | Lines 3-4, Pg 7 and Lines 5-7, Pg 12                      |
| Reporting biases                               | 21     | Present assessments of risk of bias due to missing results (arising from reporting biases) for each synthesis assessed.                                                                                                                                                              | Lines 17-19, Pg 6 and Supplemental Table 2                |
| Certainty of evidence                          | 22     | Present assessments of certainty (or confidence) in the body of evidence for each outcome assessed.                                                                                                                                                                                  | Lines 17-19, Pg 6 and Supplemental Table 2                |
| <b>DISCUSSION</b>                              |        |                                                                                                                                                                                                                                                                                      |                                                           |
| Discussion                                     | 23a    | Provide a general interpretation of the results in the context of other evidence.                                                                                                                                                                                                    | Lines 20-22, Pg 7 and Lines 1-4, Pg 8                     |
|                                                | 23b    | Discuss any limitations of the evidence included in the review.                                                                                                                                                                                                                      | Lines 1-9, Pg 12                                          |
|                                                | 23c    | Discuss any limitations of the review processes used.                                                                                                                                                                                                                                | Lines 1-3, Pg 12                                          |
|                                                | 23d    | Discuss implications of the results for practice, policy, and future research.                                                                                                                                                                                                       | "Conclusion" Lines 12-17, Pg 12                           |
| <b>OTHER INFORMATION</b>                       |        |                                                                                                                                                                                                                                                                                      |                                                           |
| Registration and protocol                      | 24a    | Provide registration information for the review, including register name and registration number, or state that the review was not registered.                                                                                                                                       | Lines 6-10, Pg 4                                          |
|                                                | 24b    | Indicate where the review protocol can be accessed, or state that a protocol was not prepared.                                                                                                                                                                                       | Protocol not prepared. Lines 8-10, Pg 4                   |
|                                                | 24c    | Describe and explain any amendments to information provided at registration or in the protocol.                                                                                                                                                                                      | Not applicable                                            |
| Support                                        | 25     | Describe sources of financial or non-financial support for the review, and the role of the funders or sponsors in the review.                                                                                                                                                        | Not applicable                                            |
| Competing interests                            | 26     | Declare any competing interests of review authors.                                                                                                                                                                                                                                   | Not applicable                                            |
| Availability of data, code and other materials | 27     | Report which of the following are publicly available and where they can be found: template data collection forms; data extracted from included studies; data used for all analyses; analytic code; any other materials used in the review.                                           | Data is available within manuscript.                      |

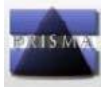

## PRISMA 2020 Checklist

*From:* Page MJ, McKenzie JE, Bossuyt PM, Boutron I, Hoffmann TC, Mulrow CD, et al. The PRISMA 2020 statement: an updated guideline for reporting systematic reviews. *BMJ* 2021;372:n71. doi: 10.1136/bmj.n71

For more information, visit: <http://www.prisma-statement.org/>

Table S2: Risk of bias among included studies using Newcastle Ottawa score

| Study                           | Selection                        |                                |                                         |                 | Comparability:<br>The subjects in different outcome groups are comparable | Outcome:                   |                   | Total score |
|---------------------------------|----------------------------------|--------------------------------|-----------------------------------------|-----------------|---------------------------------------------------------------------------|----------------------------|-------------------|-------------|
|                                 | Representativeness of the sample | Selection of the control group | Ascertainment of the exposure (disease) | Non-respondents |                                                                           | Assessment of the outcome: | Statistical test: |             |
| Abdelwahab et al. <sup>19</sup> | 1                                | 1                              | 2                                       | 1               | 2                                                                         | 2                          | 1                 | 10          |
| Buchanan et al. <sup>18</sup>   | 1                                | 1                              | 2                                       | 1               | 2                                                                         | 2                          | 1                 | 10          |
| Lee et al. <sup>17</sup>        | 1                                | 1                              | 2                                       | 1               | 2                                                                         | 2                          | 1                 | 10          |
| Redfors et al. <sup>20</sup>    | 1                                | 1                              | 2                                       | 1               | 2                                                                         | 2                          | 1                 | 10          |
| Shimonaga et al. <sup>16</sup>  | 1                                | 1                              | 1                                       | 1               | 1                                                                         | 2                          | 1                 | 8           |
| Takeuchi et al. <sup>21</sup>   | 1                                | 1                              | 2                                       | 1               | 1                                                                         | 2                          | 1                 | 9           |
| Tamez et al. <sup>15</sup>      | 1                                | 1                              | 2                                       | 1               | 2                                                                         | 2                          | 1                 | 10          |
| Tang et al. <sup>13</sup>       | 1                                | 1                              | 2                                       | 1               | 1                                                                         | 2                          | 1                 | 9           |
| Wang et al. <sup>14</sup>       | 1                                | 1                              | 2                                       | 1               | 1                                                                         | 2                          | 0                 | 8           |
| Richardt et al. <sup>24</sup>   | 1                                | 1                              | 2                                       | 1               | 1                                                                         | 2                          | 1                 | 9           |
| Gao et al. <sup>23</sup>        | 1                                | 1                              | 2                                       | 1               | 2                                                                         | 2                          | 1                 | 10          |
| Azzalini et al. <sup>22</sup>   | 1                                | 1                              | 2                                       | 1               | 2                                                                         | 2                          | 1                 | 10          |

Table S3: Definition of major adverse cardiac events

| Study                           | MACE definition                                                                        |
|---------------------------------|----------------------------------------------------------------------------------------|
| Abdelwahab et al. <sup>19</sup> | Composite of all-cause mortality, MI and CVA                                           |
| Buchanan et al. <sup>18</sup>   | Composite of all-cause mortality, MI and ischemia-driven repeat revascularization      |
| Lee et al. <sup>17</sup>        | Composite of all-cause mortality, MI and ischemia-driven repeat revascularization      |
| Redfors et al. <sup>20</sup>    | Composite of cardiac mortality, MI and stent thrombosis                                |
| Shimonaga et al. <sup>16</sup>  | NA                                                                                     |
| Tamez et al. <sup>15</sup>      | Composite of all-cause mortality, MI, CVA and ischemia-driven repeat revascularization |
| Tang et al. <sup>13</sup>       | Composite of cardiac mortality, MI and ischemia-driven repeat revascularization        |
| Wang et al. <sup>14</sup>       | Composite of all-cause mortality, MI and acute heart failure                           |
| Richardt et al. <sup>24</sup>   | Composite of all-cause mortality, MI and ischemia-driven repeat revascularization      |
| Gao et al. <sup>23</sup>        | Composite of cardiac mortality, MI and ischemia-driven repeat revascularization        |
| Azzalini et al. <sup>22</sup>   | Composite of cardiac mortality, MI and ischemia-driven repeat revascularization        |

**Table S4: Risk adjustment in the included studies**

| Study                           | Adjusted outcomes? | Variables adjusted for                                                                                                                                                                                                                                                                                                                                                                            |
|---------------------------------|--------------------|---------------------------------------------------------------------------------------------------------------------------------------------------------------------------------------------------------------------------------------------------------------------------------------------------------------------------------------------------------------------------------------------------|
| Abdelwahab et al. <sup>19</sup> | Yes                | Age (>75 years), diabetes, hypertension, smoking, hyperlipidaemia, positive family history of coronary artery disease, previous myocardial infarction, atrial fibrillation, STEMI, target vessel: left anterior descending, chronic total occlusion, long lesion (>15 mm), type C lesion, bifurcation lesion and stent type                                                                       |
| Buchanan et al. <sup>18</sup>   | Yes                | Clinical presentation of MI                                                                                                                                                                                                                                                                                                                                                                       |
| Lee et al. <sup>17</sup>        | Yes                | Age, sex, hypertension, diabetes mellitus, dyslipidemia, smoking, chronic renal failure on hemodialysis, history of myocardial infarction, history of coronary artery bypass grafting, history of peripheral artery disease, history of cerebrovascular accident, clinical presentation of index CTO PCI, and ejection fraction (EF).                                                             |
| Redfors et al. <sup>20</sup>    | Yes                | Age, sex, diabetes, smoking (current), renal insufficiency, clinical presentation, previous MI, previous coronary artery bypass grafting, anemia, PRU, left anterior descending coronary artery (LAD) as culprit vessel, multivessel disease, PCI against a graft vessel, bifurcation lesion, moderate or severe coronary calcification, total stent length, vessel diameter, and DES generation. |
| Takeuchi et al. <sup>21</sup>   | Yes                | Age, gender, CKD incidence, hemoglobin level, and hs-CRP level                                                                                                                                                                                                                                                                                                                                    |
| Tamez et al. <sup>15</sup>      | Yes                | Age, sex, race, ethnicity, diabetes, chronic kidney disease stage, hypertension, dyslipidaemia, PCI indication, bifurcation lesion, lesion in graft, chronic total occlusion, stent type, total stent length, and minimum stent diameter                                                                                                                                                          |
| Tang et al. <sup>13</sup>       | Yes                | Adjusted for clinical, angiographic, and procedural variables                                                                                                                                                                                                                                                                                                                                     |
| Wang et al. <sup>14</sup>       | No                 |                                                                                                                                                                                                                                                                                                                                                                                                   |
| Richardt et al. <sup>24</sup>   | No                 |                                                                                                                                                                                                                                                                                                                                                                                                   |
| Gao et al. <sup>23</sup>        | Yes                | Sex, age, prior MI, prior percutaneous coronary intervention, previous coronary artery bypass graft, diabetes mellitus, hypertension, unstable angina, left main lesion, number of stents, number of lesions, sirolimus DES treatment, stent diameter, stent length, postdilation angioplasty, use of intravascular ultrasound                                                                    |
| Azzalini et al. <sup>22</sup>   | Yes                | Age, center, prior MI, Diabetes, prior CABG, eGFR, acute coronary syndrome presentation, number of diseased vessels, J-CTO score, PROGRESSCTO score, use of DES, procedural success, major procedural complications, and use of dissection/re-entry techniques.                                                                                                                                   |

Table S5: Definitions of Myocardial infarction in included studies

| Study                           | MI definition                                                                                                                                                                                                                                                                                                                                                                                                                                                                                                                                                                                                                                                                                                                                                                                                                                                                                                                                                                                                                                                                                                                                                                                                                                                                                                                                                                                                                                                                                                                                                                                                                                                                                                                                                                                                                                                                                                                                                                                                                                                                                                                                                                                                                                                                                                                                                                                                                                                                                                                                                                                                                                                                                                                                                                        |
|---------------------------------|--------------------------------------------------------------------------------------------------------------------------------------------------------------------------------------------------------------------------------------------------------------------------------------------------------------------------------------------------------------------------------------------------------------------------------------------------------------------------------------------------------------------------------------------------------------------------------------------------------------------------------------------------------------------------------------------------------------------------------------------------------------------------------------------------------------------------------------------------------------------------------------------------------------------------------------------------------------------------------------------------------------------------------------------------------------------------------------------------------------------------------------------------------------------------------------------------------------------------------------------------------------------------------------------------------------------------------------------------------------------------------------------------------------------------------------------------------------------------------------------------------------------------------------------------------------------------------------------------------------------------------------------------------------------------------------------------------------------------------------------------------------------------------------------------------------------------------------------------------------------------------------------------------------------------------------------------------------------------------------------------------------------------------------------------------------------------------------------------------------------------------------------------------------------------------------------------------------------------------------------------------------------------------------------------------------------------------------------------------------------------------------------------------------------------------------------------------------------------------------------------------------------------------------------------------------------------------------------------------------------------------------------------------------------------------------------------------------------------------------------------------------------------------------|
| Abdelwahab et al. <sup>19</sup> | ST-elevation myocardial infarction (STEMI; ST-elevation at least 1 mm in two or more limb leads, or at least 2 mm in two or more contiguous precordial leads or development of new left bundle branch block on the ECG) or non-ST-elevation myocardial infarction (NSTEMI; pathological increase of cardiac specific enzymes with CK-MB >1.5 times of normal limits, Troponin T or I >99th percentile of normal value)                                                                                                                                                                                                                                                                                                                                                                                                                                                                                                                                                                                                                                                                                                                                                                                                                                                                                                                                                                                                                                                                                                                                                                                                                                                                                                                                                                                                                                                                                                                                                                                                                                                                                                                                                                                                                                                                                                                                                                                                                                                                                                                                                                                                                                                                                                                                                               |
| Buchanan et al. <sup>18</sup>   | MI was characterized as either non-ST-segment elevation MI or ST-segment elevation myocardial infarction. Non-ST-segment elevation MI was defined by the presence of typical chest pain or angina-equivalent symptoms in association with elevated troponin cardiac marker. ST-segment elevation myocardial infarction was defined by the presence of typical chest pain or angina-equivalent symptoms in association with ST-segment elevation on presenting electrocardiogram or new left bundle-branch block. MI was further characterized by Q-wave myocardial infarction (QWMI) if new Q waves deeper than 1 mm occurred in the 2 contiguous leads; otherwise, non-QWMI was diagnosed.                                                                                                                                                                                                                                                                                                                                                                                                                                                                                                                                                                                                                                                                                                                                                                                                                                                                                                                                                                                                                                                                                                                                                                                                                                                                                                                                                                                                                                                                                                                                                                                                                                                                                                                                                                                                                                                                                                                                                                                                                                                                                          |
| Lee et al. <sup>17</sup>        | nonfatal MI                                                                                                                                                                                                                                                                                                                                                                                                                                                                                                                                                                                                                                                                                                                                                                                                                                                                                                                                                                                                                                                                                                                                                                                                                                                                                                                                                                                                                                                                                                                                                                                                                                                                                                                                                                                                                                                                                                                                                                                                                                                                                                                                                                                                                                                                                                                                                                                                                                                                                                                                                                                                                                                                                                                                                                          |
| Redfors et al. <sup>20</sup>    | <p>MI was defined according to the Acute Catheterization and Urgent Intervention Triage Strategy criteria. (A) MI diagnosis before angiography or in medically treated patients: (1) If the peak troponin or creatine kinase (CK)-MB (or CK) levels are elevated but the peak has not yet been reached: Recurrent chest pain or ischemic equivalent symptoms lasting <math>\geq 30</math> minutes, or new ECG changes consistent with MI and the next troponin or CK-MB (or CK) level measured approximately 8 to 12 hours after the event is elevated by at least 50% above the previous level. (2) If the elevated troponin or CK-MB (or CK) levels are falling or have returned to normal: Recurrent chest pain or ischemic equivalent symptoms lasting <math>\geq 30</math> minutes, and a new elevation of troponin or CK-MB (or CK) &gt;upper limits of normal (ULN) if the troponin or CK-MB (or CK) level has returned to &lt;ULN, or a rise above the previous nadir level if the troponin or CK-MB (or CK) level has not returned to &lt;ULN.</p> <p>(B) MI diagnosis after PCI: (1) If the baseline CK-MB (or CK) levels are normal: A new elevation of troponin or CK-MB <math>&gt;3 \times</math> ULN (or CK <math>&gt;3 \times</math> ULN) within 24 hours post-PCI. (2) If the baseline CK-MB (or CK) levels are elevated, but documented to be falling: recurrent chest pain or ischemic equivalent symptoms lasting <math>\geq 30</math> minutes, and an absolute rise of CK-MB <math>&gt;3 \times</math> ULN (or an absolute rise in CK <math>&gt;2 \times</math> ULN) above the previous nadir level within 24 hours post-PCI. (3) If the peak CK-MB (or CK) has not yet been reached before PCI: Recurrent chest pain or ischemic equivalent symptoms lasting <math>\geq 30</math> minutes, or new electrocardiographic changes consistent with a reinfarction and the next CK-MB (or CK) level measured approximately 8 to 12 hours after the event is elevated by at least 50% above the previous level or <math>&gt;3 \times</math> ULN, whichever is greater.</p> <p>(C) MI diagnosis after coronary artery bypass surgery: Any CK-MB (or CK) <math>\geq 10 \times</math> ULN within 24 hours of operation and increased at least 50% over the most recent preoperation levels, or any CK-MB (or CK) <math>\geq 5 \times</math> ULN within 24 hours of operation and increased at least 50% over the most recent preoperation levels and new significant (<math>\geq 0.04</math> second) Q waves in <math>\geq 2</math> contiguous electrocardiographic leads.</p> <p>(D) Q-wave versus non-Q-wave MI: All reinfarctions will be adjudicated as being either Q wave (development of new pathologic Q waves in 2 or more contiguous leads) or non-Q wave.</p> |
| Shimonaga et al. <sup>16</sup>  | Periprocedural MI was defined as an increase in the troponin I levels greater than 0.15 ng/mL (3 times the ULN). Major PMI was defined as an increase in the troponin I levels greater than 0.75 ng/mL (15 times the ULN)                                                                                                                                                                                                                                                                                                                                                                                                                                                                                                                                                                                                                                                                                                                                                                                                                                                                                                                                                                                                                                                                                                                                                                                                                                                                                                                                                                                                                                                                                                                                                                                                                                                                                                                                                                                                                                                                                                                                                                                                                                                                                                                                                                                                                                                                                                                                                                                                                                                                                                                                                            |
| Tamez et al. <sup>15</sup>      | Not available                                                                                                                                                                                                                                                                                                                                                                                                                                                                                                                                                                                                                                                                                                                                                                                                                                                                                                                                                                                                                                                                                                                                                                                                                                                                                                                                                                                                                                                                                                                                                                                                                                                                                                                                                                                                                                                                                                                                                                                                                                                                                                                                                                                                                                                                                                                                                                                                                                                                                                                                                                                                                                                                                                                                                                        |
| Tang et al. <sup>13</sup>       | Not available                                                                                                                                                                                                                                                                                                                                                                                                                                                                                                                                                                                                                                                                                                                                                                                                                                                                                                                                                                                                                                                                                                                                                                                                                                                                                                                                                                                                                                                                                                                                                                                                                                                                                                                                                                                                                                                                                                                                                                                                                                                                                                                                                                                                                                                                                                                                                                                                                                                                                                                                                                                                                                                                                                                                                                        |
| Wang et al. <sup>14</sup>       | Periprocedural MI was defined using the Society for Cardiovascular Angiography and Interventions (SCAI), Academic Research Consortium (ARC)-2, and fourth universal definitions.                                                                                                                                                                                                                                                                                                                                                                                                                                                                                                                                                                                                                                                                                                                                                                                                                                                                                                                                                                                                                                                                                                                                                                                                                                                                                                                                                                                                                                                                                                                                                                                                                                                                                                                                                                                                                                                                                                                                                                                                                                                                                                                                                                                                                                                                                                                                                                                                                                                                                                                                                                                                     |
| Richardt et al. <sup>24</sup>   | Myocardial infarction was defined according to an extended historical protocol definition and according to ARC definitions. 1-2 A Q-wave myocardial infarction required, in the absence of cardiac enzyme data, a history of chest pain or other acute symptoms consistent with myocardial ischemia together with new pathological Q waves in two or more contiguous ECG leads as assessed by the core lab or clinical events committee. In the presence of elevated cardiac enzymes, new pathological Q waves in two or more contiguous ECG leads as assessed by the core lab or clinical events committee were sufficient to diagnose a Q-wave myocardial infarction. In the absence of an ECG, a Q-wave myocardial infarction could be adjudicated on the basis of the clinical scenario and appropriate cardiac enzyme data.                                                                                                                                                                                                                                                                                                                                                                                                                                                                                                                                                                                                                                                                                                                                                                                                                                                                                                                                                                                                                                                                                                                                                                                                                                                                                                                                                                                                                                                                                                                                                                                                                                                                                                                                                                                                                                                                                                                                                     |
| Gao et al. <sup>23</sup>        | MI was diagnosed by electrocardiographic changes and/or a rise and fall of creatine kinase-myocardial band (CK-MB) fraction in the presence of ischemic symptoms. New development of pathological Q waves in 2 contiguous leads was defined as Q-wave MI; and in the absence of pathological Q waves, an elevation in CK-MB level $>3$ times the upper limit of normal was defined as non-Q-wave MI.                                                                                                                                                                                                                                                                                                                                                                                                                                                                                                                                                                                                                                                                                                                                                                                                                                                                                                                                                                                                                                                                                                                                                                                                                                                                                                                                                                                                                                                                                                                                                                                                                                                                                                                                                                                                                                                                                                                                                                                                                                                                                                                                                                                                                                                                                                                                                                                 |
| Azzalini et al. <sup>22</sup>   | Periprocedural type 4a MI, target vessel MI (Q wave and non-Q wave MI) definition was not explicit                                                                                                                                                                                                                                                                                                                                                                                                                                                                                                                                                                                                                                                                                                                                                                                                                                                                                                                                                                                                                                                                                                                                                                                                                                                                                                                                                                                                                                                                                                                                                                                                                                                                                                                                                                                                                                                                                                                                                                                                                                                                                                                                                                                                                                                                                                                                                                                                                                                                                                                                                                                                                                                                                   |



Figure S1: Funnel plot for publication bias

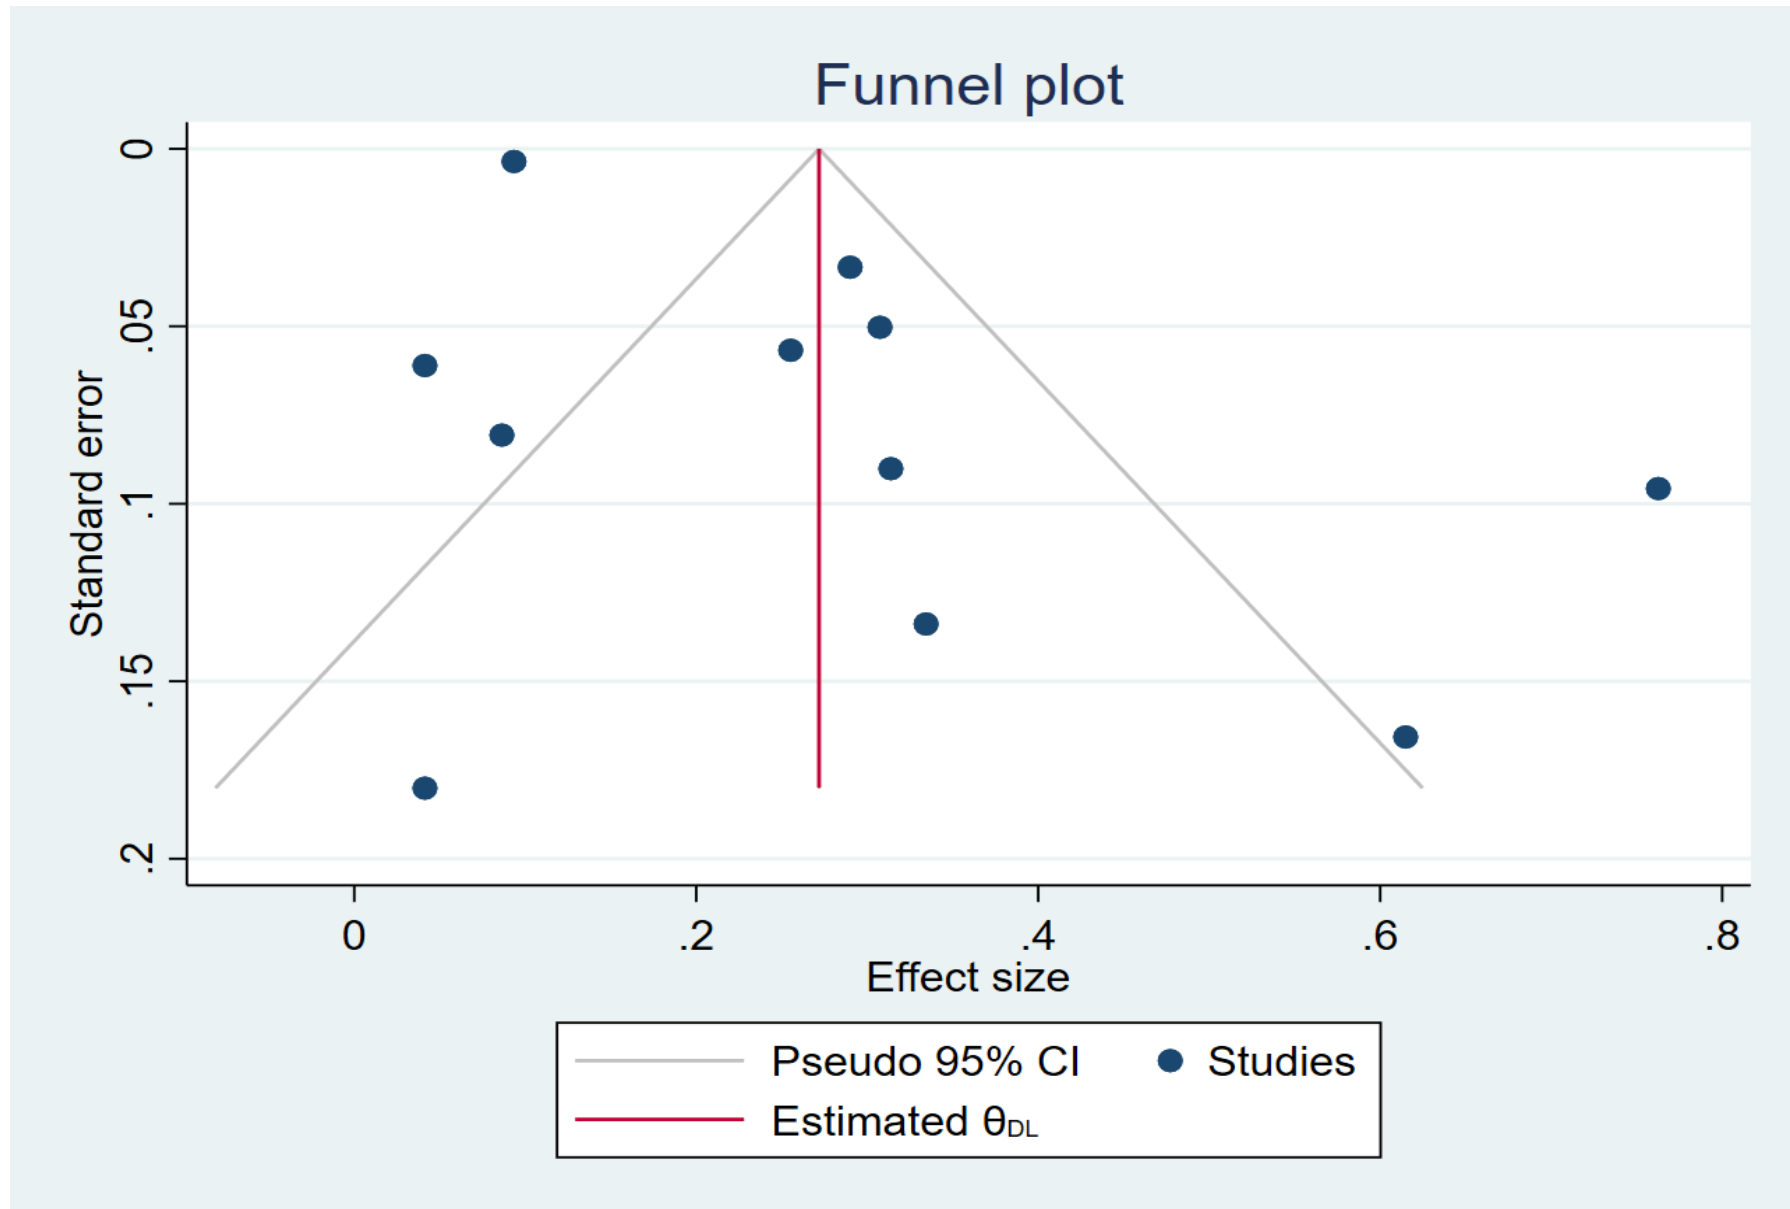

Supplement: JAH3-12-e029300-s001.pdf [file JAH3-12-e029300-s001.pdf]
